# Supplementary material for: Revised metal-silicate partitioning does not require the Late Veneer
Source: Research Square preprint supplement (doi:10.21203/rs.3.rs-5697204/v1), 2025-02-13
Supplement: Supplementary file 1 [file a5ae2313b1dcf0c9c2778edc.docx]

**Supplementary Information**

**Supplementary discussion.**

**Assessment of absence of metal nugget in the silicate quench texture.**

In some previous studies, small (~50 nm to ~1 μm) metallic inclusions in quenched silicate melt region, often referred as nuggets, caused difficulty in interpretation of HSE partition coefficients (Cottrell and Walter, 2006; Ertel et al., 2008; Laurenz et al., 2010). These metal nuggets are considered to be formed at the beginning of partitioning experiments in the case that the oxygen fugacity (*f*O2) of the starting silicate powder is much higher than the *f*O2 at the metal-silicate equilibrium (Ertel et al., 2006; Médard et al., 2015), and formation of metal nuggets can be minimized by using reduced starting silicate composition (Médard et al., 2015). Therefore, we baked the starting silicate powder under iron-wüstite buffer for 24 hours at 1373 K (Methods), to avoid the metal nugget formation. As shown in Fig. 1b, scattered Fe-rich phase was observed in quench crystal structure of silicate melts. To assess whether the Fe-rich phase is metal or silicate, we conducted element mapping analyses with FE-EPMA. Extended Data Figure 4 shows images of Fe and Pt for sample 1K3507 (18 GPa, 2573 K, High-HSE concentration). The Fe-rich phase was clearly recognized, but no Pt-rich phase was observed in the silicate melt portion. Therefore, the Fe-rich phase was not metal but silicate, and it is concluded that no nugget was developed in our samples.

**Partitioning behavior of the HSEs.**

Extended Data Figure 5 shows the HSE concentrations in silicate melts as a function of HSE concentrations in metal liquid, from partitioning experiments at 18 GPa and 2573 K. For Ru, Re, and Pt, the concentrations in silicate melts increase with increasing concentrations in metal liquids from ~100 ppm to 1000 ppm, then do not significantly change with increasing concentrations in metal liquids up to 10 wt. %. Such behavior results in apparent inclement of *D*s with increasing HSE concentrations in metal liquids from 1000 ppm to 10 wt. %. Pd concentration in silicate melts drastically increase with increasing concentration in metal liquids, which results in similar Pd partition coefficients (Fig. 2a). We have no data of Os and Ir for the Super-low HSE concentration case (~100 ppm in metal liquid). The Os and Ir partitioning behaviors with increasing concentrations in metal liquids from 1000 ppm to 10 wt.% seem contrary to that of the Pd. For the Mid- to High-HSE concentration cases (~1 wt% and ~10 wt.% in metal liquid), incorporations of Os and Ir into a silicate melt may be inhibited by large amount of Pd. The unique partitioning behavior of Pd may be related to its incorporation style in silicate melts. In Borisov et al. (1994), probable Pd species in silicate melts are Pd2+, Pd1+, and Pd0, and dominant Pd species change with oxygen fugacity. Below IW buffer, as the oxygen fugacity in this study, Pd0 can be dominant. Since other HSEs are in valence state of 1+-3+, only Pd incorporate into silicate melts with valence state of 0, without bonding to oxygen. Although we have no clear explanation about the unique behavior of Pd partitioning at this moment, investigation on incorporation manner in silicate melts may provide clues about partitioning mechanism of siderophile elements.

**HSE composition of the Martian mantle**

The HSE composition of the Martian mantle is broadly similar to that of the Earth’s mantle, but Pd and Pt concentrations are lower than other HSEs. We calculated HSE partitioning during core-mantle differentiation of the Mars with partition coefficients at 18 GPa, and the calculated Martian mantle has generally chondritic HSE relative abundances and HSE concentrations about one order of magnitude lower than that estimated in Day (2013) (Fig. 3b). In addition, the lower concentrations of Pd and Pt than other HSEs in Day (2013)’s Martian mantle cannot be provided with our partition coefficients. In order to obtain lower concentrations of Pd and Pt, metal-silicate partition coefficients of Pd and Pt should be larger than partition coefficients of other HSEs. One probability to solve this problem is the existence of light elements such as sulfur in the Martian core. The Martian core has been considered to be enriched in light elements, and a recent study has predicted 9-15 wt.% light elements, mainly sulfur, in the Martian core (Khan et al., 2023). Experimental studies about HSE partitioning between silicate melt and Fe-S metal liquid have shown that the metal-silicate partition coefficients decrease with increasing sulfur content in the metal (Laurenz et al., 2016). The decreasing rate of partition coefficients with increasing sulfur content differs among HSEs, and decreasing rate of DIr and DRu are larger than that of DPt and DPd. Therefore, in the sulfur-containing system, DPt and DPd may be larger than partition coefficients of other HSEs. Since Laurenz et al. (2016) conducted partitioning experiments with high-HSE composition (~10 wt.% HSEs in the Fe-S), revising experiments with low HSE concentrations are required for S-bearing system.

**References.**

Borisov, A., Palme, H., & Spettel, B. (1994). Solubility of palladium in silicate melts:

implications for core formation in the Earth. *Geochimica et Cosmochimica*

*Acta*, *58*(2), 705-716.

Cottrell, E., & Walker, D. (2006). Constraints on core formation from Pt partitioning in

mafic silicate liquids at high temperatures. *Geochimica et Cosmochimica*

*Acta*, *70*(6), 1565-1580.

Day, J. M. (2013). Hotspot volcanism and highly siderophile elements. *Chemical*

*Geology*, *341*, 50-74.

Ertel, W., Walter, M. J., Drake, M. J., & Sylvester, P. J. (2006). Experimental study of

platinum solubility in silicate melt to 14 GPa and 2273 K: Implications for

accretion and core formation in Earth. *Geochimica et Cosmochimica*

*Acta*, *70*(10), 2591-2602.

Ertel, W., Dingwell, D. B., & Sylvester, P. J. (2008). Siderophile elements in silicate

melts—A review of the mechanically assisted equilibration technique and the

nanonugget issue. *Chemical geology*, *248*(3-4), 119-139.

Khan, A., Huang, D., Durán, C., Sossi, P. A., Giardini, D., & Murakami, M. (2023). Evidence for a liquid silicate layer atop the Martian core. *Nature*, *622*(7984), 718-723.

Laurenz, V., Fonseca, R. O. C., Ballhaus, C., & Sylvester, P. J. (2010). Solubility of palladium in picritic melts: 1. The effect of iron. *Geochimica et Cosmochimica Acta*, *74*(10), 2989-2998.

Laurenz, V., Rubie, D. C., Frost, D. J., & Vogel, A. K. (2016). The importance of sulfur for the behavior of highly-siderophile elements during Earth’s differentiation. *Geochimica et Cosmochimica Acta*, *194*, 123-138.

Médard, E., Schmidt, M. W., Wälle, M., Keller, N. S., & Günther, D. (2015). Platinum partitioning between metal and silicate melts: Core formation, late veneer and the nanonuggets issue. *Geochimica et Cosmochimica Acta*, *162*, 183-201.
